# Supplementary material for: A 2D bilayered metal–organic framework as a fluorescent sensor for highly selective sensing of nitro explosives
Source: Royal Society of Chemistry journal article supplement (doi:10.1039/c5dt00515a), 2015-01-01
Supplement: c5dt00515a1.pdf [file c5dt00515a1.pdf]

## Supporting information

### **A 2D bilayer metal-organic framework as fluorescence sensor for highly selective sensing of nitro explosives**

**Xiao-Li Hu, Fu-Hong Liu, Chao Qin,\* Kui-Zhan Shao and Zhong-Min Su\***

Institute of Functional Material Chemistry; Faculty of Chemistry, Northeast Normal University, Changchun, 130024, People's Republic of China; E-mail: qinc703@nenu.edu.cn; zmsu@nenu.edu.cn.

## **S1. Materials and measurements**

All chemical materials were purchased from commercial sources and used without further purification. The FT-IR spectra were recorded from KBr pellets in the range 4000–400  $\text{cm}^{-1}$  on a Mattson Alpha-Centauri spectrometer. XRPD patterns were recorded on a Siemens D5005 diffractometer with Cu  $K\alpha$  ( $\lambda = 1.5418 \text{ \AA}$ ) radiation in the range of 3–60° at a rate of 5°/min. The UV-Vis absorption spectra were examined on a Shimadzu UV-2550 spectrophotometer in the wavelength range of 200–800 nm. The C, H, and N elemental analyses were conducted on a Perkin-Elmer 2400CHN elemental analyzer. TG curves were performed on a Perkin-Elmer TG-7 analyzer heated from room temperature to 1000 °C at a ramp rate of 5 °C/min under nitrogen. The photoluminescence spectra were measured on a Perkin-Elmer FLS-920 Edinburgh Fluorescence Spectrometer.

## **S2. X-ray crystallography**

Single-crystal X-ray diffraction data for MOF **1** were recorded by using a Bruker Apex CCD diffractometer with graphite-monochromated Mo- $K\alpha$  radiation ( $\lambda = 0.71069 \text{ \AA}$ ) at 293 K. Absorption corrections were applied by using a multi-scan technique. All the structures were solved by Direct Method of SHELXS-97 and refined by full-matrix least-squares techniques using the SHELXL-97 program within WINGX. Non-hydrogen atoms were refined with anisotropic temperature parameters.

The detailed crystallographic data and structure refinement parameters for MOF **1** are summarized in Table S1.

## **S3. The solvent sensing experiment**

The solvent sensing experiment has been performed as follows: finely ground samples of **1a** was immersed in different organic solvents (3 mL), treated by ultrasonication for 30 minutes, and then aged to form stable emulsions before fluorescence was measured.

**Table S1 Crystal data and structure refinement for MOF 1**

---

| Formula                                                          | $C_{62}H_{69}N_7O_{17}Cd_3$ (1) |
|------------------------------------------------------------------|---------------------------------|
| Formula weight                                                   | 1521.5                          |
| Crystal system                                                   | triclinic                       |
| Space group                                                      | <i>P</i> -1                     |
| <i>a</i> (Å)                                                     | 13.530(5)                       |
| <i>b</i> (Å)                                                     | 14.255(5)                       |
| <i>c</i> (Å)                                                     | 19.655(5)                       |
| $\alpha$ (°)                                                     | 73.034(5)                       |
| $\beta$ (°)                                                      | 74.572(5)                       |
| $\gamma$ (°)                                                     | 62.256(5)                       |
| <i>V</i> (Å <sup>3</sup> )                                       | 3170.9(18)                      |
| <i>Z</i>                                                         | 2                               |
| <i>D</i> <sub>calcd.</sub> [gcm <sup>-3</sup> ]                  | 1.548                           |
| <i>F</i> (000)                                                   | 1492                            |
| Reflections collected                                            | 18392/11131                     |
| <i>R</i> (int)                                                   | 0.0291                          |
| Goodness-of-fit on <i>F</i> <sup>2</sup>                         | 1.019                           |
| <i>R</i> <sub>1</sub> <sup>a</sup> [ <i>I</i> > 2σ ( <i>I</i> )] | 0.0534                          |
| <i>wR</i> <sub>2</sub> <sup>b</sup>                              | 0.1386                          |

---

<sup>a</sup> $R_1 = \frac{\sum ||F_o| - |F_c||}{\sum |F_o|}$ , <sup>b</sup>  $wR_2 = \frac{|\sum w(|F_o|^2 - |F_c|^2)|}{\sum w(F_o^2)^2}^{1/2}$

---

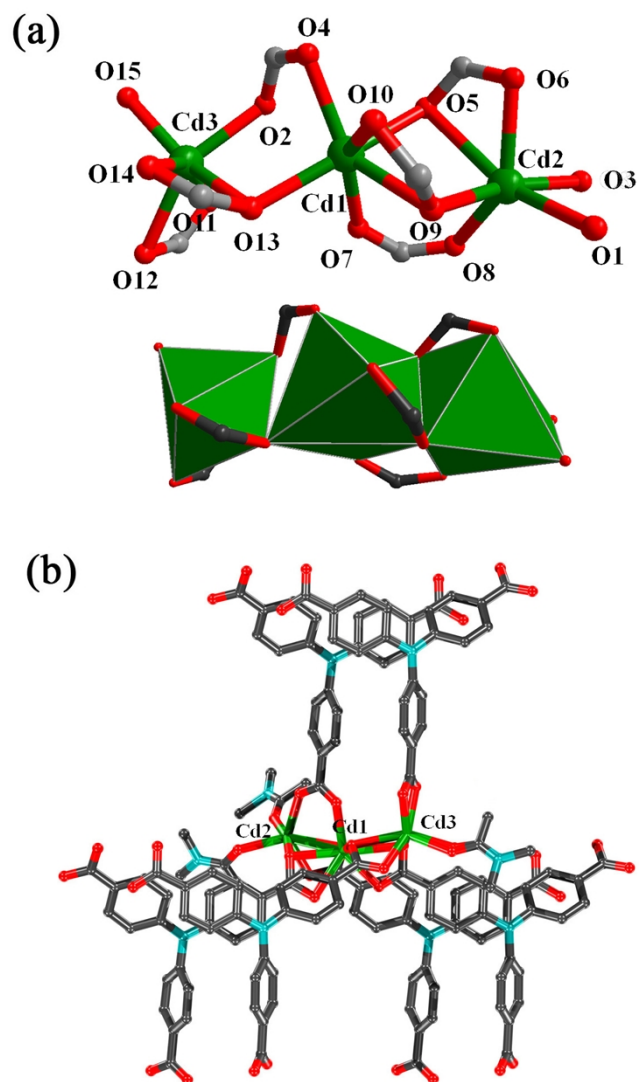

**Fig. S1** Coordination environments and the representations of  $[\text{Cd}_3(\text{CO}_2)_6]$  cluster.

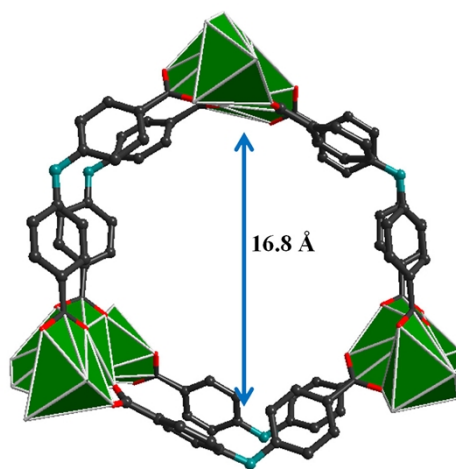

**Fig. S2** The view of the 2D bilayer containing hexagonal windows along  $c$  axis.

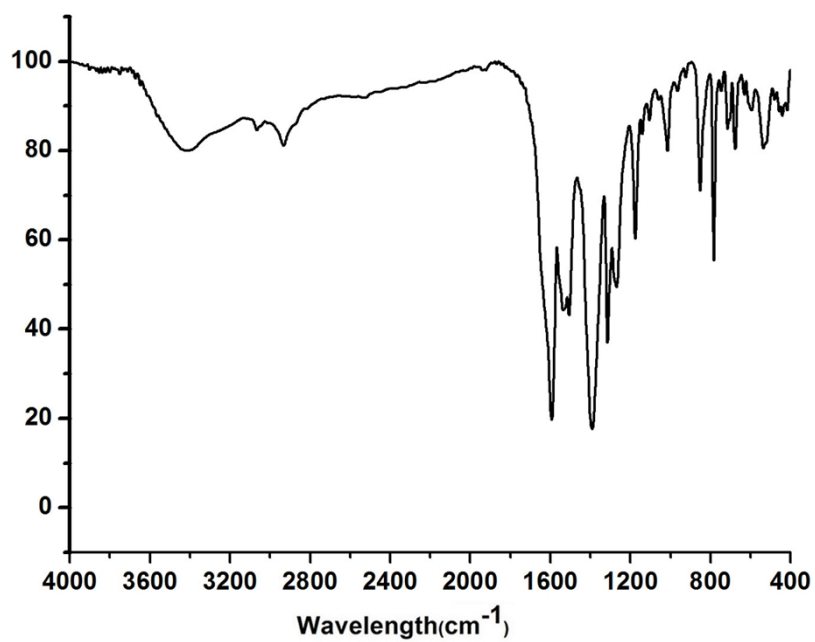

**Fig. S3** FT-IR spectra of **1**.

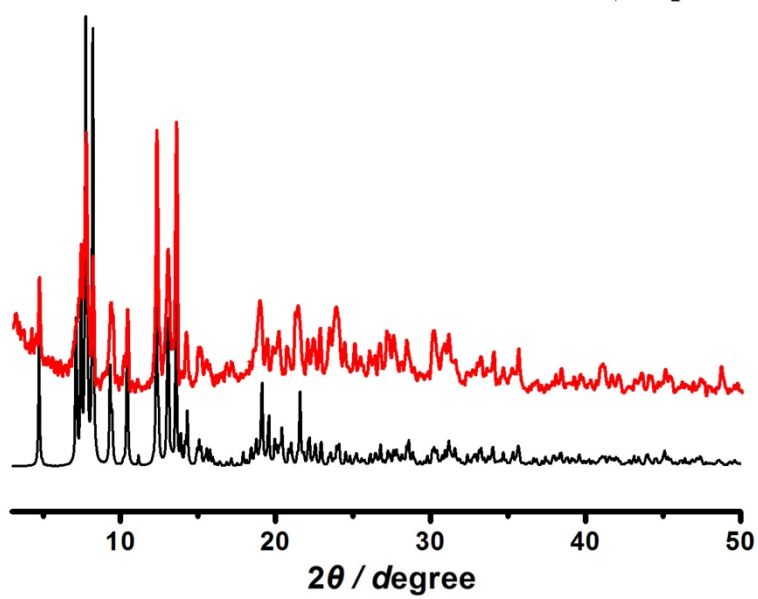

**Fig. S4** X-ray powder diffraction patterns of **1**: simulated (black) and as-synthesized (red).

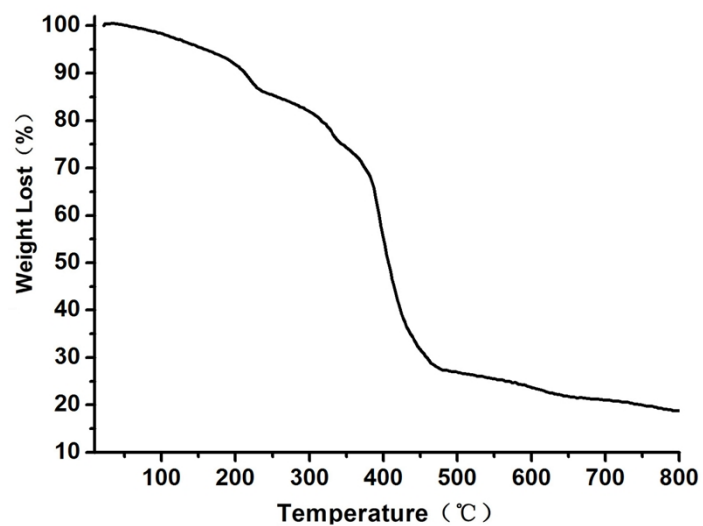

**Fig. S5** TG curve of MOF 1

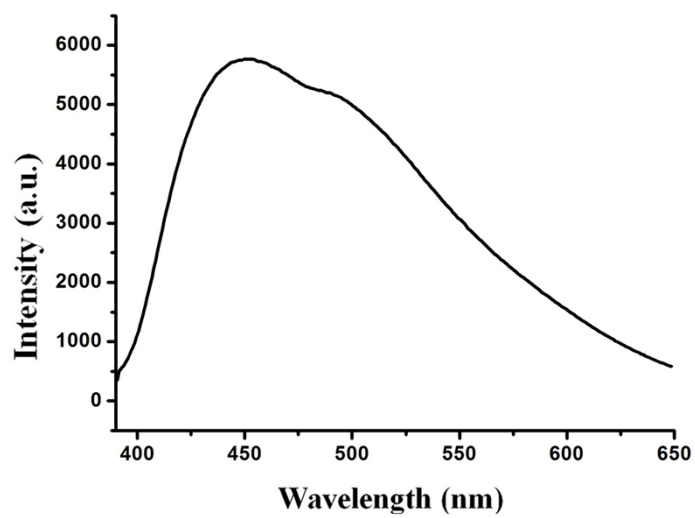

**Fig. S6** Emission spectra of the H<sub>3</sub>NTB ligand.

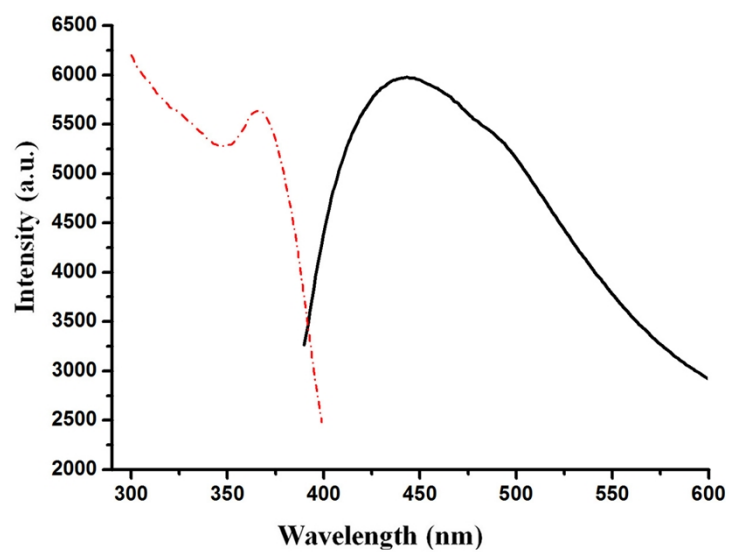

**Fig. S7** The excitation (red) and emission (black) spectra of MOF **1**.

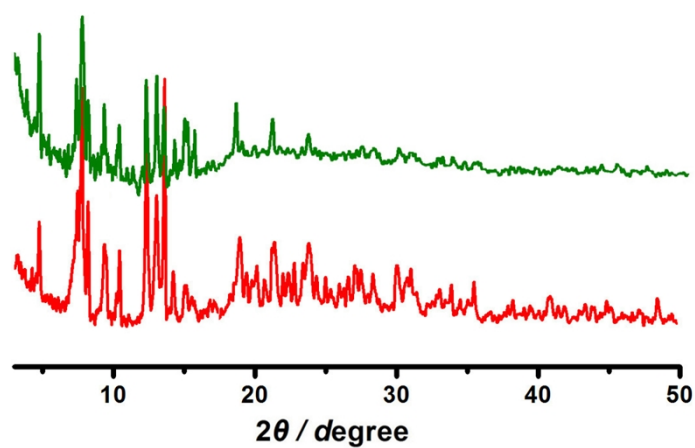

**Fig. S8** X-ray powder diffraction patterns of **1**: as-synthesized (red) and after 5 cycles of quenching TNP (green).

**Table S2** Selected bond lengths [ $\text{\AA}$ ] for MOF **1**

|               |            |               |           |
|---------------|------------|---------------|-----------|
| Cd(1)-O(7)#3  | 2.234(4)   | Cd(3)-O(15B)  | 2.203(17) |
| Cd(1)-O(4)    | 2.255(5)   | Cd(3)-O(15A)  | 2.223(12) |
| Cd(1)-O(13)#4 | 2.316(5)   | Cd(3)-O(14)#4 | 2.239(5)  |
| Cd(1)-O(5)    | 2.386(5)   | Cd(3)-O(2)    | 96.2(4)   |
| Cd(1)-O(9)#4  | 2.402(5)   | Cd(3)-O(11)#3 | 2.430(6)  |
| Cd(1)-O(10)#4 | 2.436(5)   | Cd(3)-O(13)#4 | 2.531(5)  |
| Cd(1)-Cd(2)   | 3.4668(11) | O(9)-Cd(2)#2  | 2.315(5)  |
| Cd(2)-O(8)#3  | 2.198(5)   | O(9)-Cd(1)#2  | 2.402(5)  |
| Cd(2)-O(3)    | 2.222(8)   | O(10)-Cd(1)#2 | 2.436(5)  |
| Cd(2)-O(1)    | 2.259(6)   | O(11)-Cd(3)#1 | 2.430(6)  |
| Cd(2)-O(6)    | 2.263(5)   | O(12)-Cd(3)#1 | 2.193(5)  |
| Cd(2)-O(9)#4  | 2.315(5)   | O(13)-Cd(1)#2 | 2.316(5)  |
| Cd(2)-O(5)    | 2.572(5)   | O(13)-Cd(3)#2 | 2.531(5)  |
| Cd(3)-O(12)#3 | 2.193(5)   | O(14)-Cd(3)#2 | 2.239(5)  |

**Table S3** Selected bond angles [ $^\circ$ ] for **1**

|                       |            |                       |            |
|-----------------------|------------|-----------------------|------------|
| O(7)#3-Cd(1)-O(4)     | 141.76(19) | O(1)-Cd(2)-O(9)#4     | 88.1(2)    |
| O(7)#3-Cd(1)-O(13)#4  | 84.25(18)  | O(6)-Cd(2)-O(9)#4     | 97.7(2)    |
| O(4)-Cd(1)-O(13)#4    | 97.46(19)  | O(8)#3-Cd(2)-O(5)     | 85.19(18)  |
| O(7)#3-Cd(1)-O(5)     | 85.55(18)  | O(3)-Cd(2)-O(5)       | 106.9(3)   |
| O(4)-Cd(1)-O(5)       | 83.87(19)  | O(1)-Cd(2)-O(5)       | 155.0(2)   |
| O(13)#4-Cd(1)-O(5)    | 164.99(16) | O(6)-Cd(2)-O(5)       | 53.45(17)  |
| O(7)#3-Cd(1)-O(9)#4   | 86.68(17)  | O(9)#4-Cd(2)-O(5)     | 84.81(16)  |
| O(4)-Cd(1)-O(9)#4     | 129.20(18) | O(8)#3-Cd(2)-Cd(1)    | 74.82(14)  |
| O(13)#4-Cd(1)-O(9)#4  | 103.14(17) | O(3)-Cd(2)-Cd(1)      | 147.8(3)   |
| O(5)-Cd(1)-O(9)#4     | 87.20(17)  | O(1)-Cd(2)-Cd(1)      | 131.34(19) |
| O(7)#3-Cd(1)-O(10)#4  | 138.68(17) | O(12)#3-Cd(3)-O(15B)  | 103.1(5)   |
| O(4)-Cd(1)-O(10)#4    | 79.54(19)  | O(12)#3-Cd(3)-O(15A)  | 96.3(4)    |
| O(13)#4-Cd(1)-O(10)#4 | 92.76(18)  | O(12)#3-Cd(3)-O(14)#4 | 150.0(2)   |
| O(5)-Cd(1)-O(10)#4    | 102.16(19) | O(12)#3-Cd(3)-O(2)    | 92.3(2)    |
| O(9)#4-Cd(1)-O(10)#4  | 53.82(17)  | O(15B)-Cd(3)-O(2)     | 100.0(5)   |
| O(7)#3-Cd(1)-Cd(2)    | 73.13(13)  | O(15A)-Cd(3)-O(2)     | 91.5(3)    |
| O(4)-Cd(1)-Cd(2)      | 122.47(15) | O(14)#4-Cd(3)-O(2)    | 109.27(19) |
| O(13)#4-Cd(1)-Cd(2)   | 137.68(12) | O(12)#3-Cd(3)-O(11)#3 | 56.2(2)    |
| O(5)-Cd(1)-Cd(2)      | 47.89(12)  | O(15B)-Cd(3)-O(11)#3  | 101.3(5)   |
| O(9)#4-Cd(1)-Cd(2)    | 41.74(12)  | O(15A)-Cd(3)-O(11)#3  | 105.1(4)   |
| O(10)#4-Cd(1)-Cd(2)   | 82.31(14)  | O(14)#4-Cd(3)-O(11)#3 | 96.43(19)  |
| O(8)#3-Cd(2)-O(3)     | 93.1(3)    | O(2)-Cd(3)-O(11)#3    | 145.21(19) |
| O(8)#3-Cd(2)-O(1)     | 118.7(2)   | O(12)#3-Cd(3)-O(13)#4 | 111.2(2)   |
| O(3)-Cd(2)-O(1)       | 80.8(3)    | O(15B)-Cd(3)-O(13)#4  | 145.6(5)   |
| O(8)#3-Cd(2)-O(6)     | 136.9(2)   | O(14)#4-Cd(3)-O(13)#4 | 54.65(16)  |



---

|                     |           |                       |           |
|---------------------|-----------|-----------------------|-----------|
| O(3)-Cd(2)-O(6)     | 88.8(3)   | O(2)-Cd(3)-O(13)#4    | 81.18(17) |
| O(1)-Cd(2)-O(6)     | 104.1(2)  | O(11)#3-Cd(3)-O(13)#4 | 95.95(18) |
| O(8)#3-Cd(2)-O(9)#4 | 88.84(18) | O(15B)-Cd(3)-C(39)#3  | 104.2(5)  |
| O(3)-Cd(2)-O(9)#4   | 168.2(3)  | O(14)#4-Cd(3)-C(39)#3 | 123.4(2)  |
|                     |           | O(2)-Cd(3)-C(39)#3    | 119.3(2)  |

---
